1     **Maternal behavioural thermoregulation facilitated evolutionary transitions**  
2                                     **from egg laying to live birth**

3  
4     Amanda K. Pettersen<sup>1,2\*</sup>, Nathalie Feiner<sup>1</sup>, Daniel W.A. Noble<sup>3</sup>, Geoffrey M. While<sup>4</sup>, Tobias  
5     Uller<sup>1†</sup> & Charlie K. Cornwallis<sup>1†</sup>

6  
7         1. Department of Biology, Lund University, Sweden.

8         2. School of Life and Environmental Sciences, The University of Sydney, Australia.

9         3. Division of Ecology and Evolution, Research School of Biology, The Australian National  
10         University, Australia.

11         4. School of Natural Sciences, University of Tasmania, Australia.

12     \*Corresponding author. Email: [amanda.pettersen@sydney.edu.au](mailto:amanda.pettersen@sydney.edu.au).

13     †Joint senior author.

14 **Abstract**

15

16 Live birth is a key innovation that has evolved from egg laying ancestors over 100 times in  
17 reptiles. However, egg-laying lizards and snakes often possess preferred body temperatures that  
18 are lethal to developing embryos, which should select against egg retention. Here, we  
19 demonstrate that thermal mismatches between mothers and offspring are widespread across the  
20 squamate phylogeny. This mismatch is resolved by gravid females adjusting their body  
21 temperature towards the thermal optimum of embryos. Importantly, phylogenetic reconstructions  
22 suggest this thermoregulatory behaviour evolved in egg-laying species prior to the evolution of  
23 live birth. Maternal thermoregulatory behaviour therefore bypasses the constraints imposed by a  
24 slowly evolving thermal physiology and has likely been a key facilitator in the repeated  
25 transitions to live birth.

## 26 **Introduction**

27

28 The evolution of live birth is an important life-history adaptation in vertebrates<sup>1-3</sup>. The ecological  
29 conditions that favour the transition from egg laying (oviparity) to live birth (viviparity) are  
30 relatively well understood, especially in reptiles, with particularly strong support for the adaptive  
31 value of viviparity in cool climates<sup>3-5</sup>. By retaining embryos throughout development, mothers  
32 can buffer offspring from suboptimal nest temperatures, ensuring faster development, higher  
33 hatching success, and increased offspring viability<sup>4,6-8</sup>. This transition has allowed reptile species  
34 to diversify and persist in cool climates across the globe<sup>9</sup>.

35

36 Despite clear adaptive advantages, the evolutionary transition from oviparous ancestors to  
37 viviparity is challenging to explain. Evidence from case studies of lizards and snakes show that  
38 embryos and adults of oviparous species have different thermal requirements, with adult  
39 preferred body temperatures often exceeding the upper lethal limit of embryos<sup>6,10-12</sup>. For  
40 example, the average nest temperature of the Iberian emerald lizard, *Lacerta schreiberi*, is 24°C,  
41 rarely exceeding 30°C, whereas the preferred body temperature of females is 33°C<sup>13</sup>. Since  
42 embryos are well adapted to the temperatures they typically experience in the nest, they  
43 generally have limited capacity to develop at temperatures outside of this range<sup>14-16</sup>. Prolonged  
44 exposure to temperatures optimal for adult female performance should therefore result in  
45 offspring abnormality and death<sup>15,17-19</sup>.

46

47 A mismatch between thermal optima of embryos and adult females should prevent mothers from  
48 retaining embryos throughout development, inhibiting evolutionary transitions to live birth<sup>20</sup>.

49 Despite this apparent constraint, live birth has evolved over 100 times in squamate reptiles<sup>21,22</sup>.

50 How can we reconcile the repeated evolution of viviparity with the potentially widespread  
51 thermal mismatches between embryos and adults in oviparous species? One possibility is that  
52 females behaviourally adjust their body temperature when pregnant to close the gap between  
53 adult and embryo thermal optima, even when substantial mismatches in thermal preferences  
54 exist. Such plasticity may temporarily come at a cost to female performance but shifting body  
55 temperatures while gravid to match the thermal optima of embryos could eliminate thermal  
56 barriers to the evolution of viviparity. An alternative possibility is that viviparity only evolves

57 from oviparity in species where there is no mismatch, that is, where adult body temperature and  
58 embryo thermal optima are well aligned.

59

60 Here we show that thermal mismatches between mothers and offspring are widespread across the  
61 squamate phylogeny. We use phylogenetic comparative analyses to examine if maternal  
62 thermoregulatory behaviour has eliminated thermal mismatches between embryos and adults,  
63 enabling the repeated evolution of viviparity across reptiles. First, we test whether adult females  
64 adjust their body temperature when gravid to better match the temperature optimum of their  
65 developing embryos. To this end, published data was collated on the thermal preferences of non-  
66 gravid and gravid females and the thermal tolerance of embryos. Using meta-analytical  
67 techniques, we calculated a standardised effect size (Hedges'  $g$ ) of the amount females change  
68 their preferred body temperature when gravid (Tables S1 & S2). Second, we test whether  
69 behavioural plasticity was more pronounced in viviparous species compared to oviparous  
70 females, as expected if thermal conflicts are more severe, and therefore avoided by species that  
71 are egg-laying. Third, we test the alternative possibility that viviparity evolves in lineages where  
72 adult and embryo optima are aligned using ancestral reconstructions.

73

## 74 **Results**

75

### 76 *Female behavioural plasticity resolves the constraints imposed by thermal physiology*

77 Across 52 species of reptiles ( $N_{\text{viviparous species}} = 32$ ,  $N_{\text{oviparous species}} = 20$ ) mismatches between the  
78 preferred temperatures of non-gravid females ( $P_{bt-ng}$ ) and embryos ( $T_{opt}$ ) were widespread. On  
79 average  $P_{bt-ng}$  of adult females was 4 °C higher than the embryonic  $T_{opt}$ . We found that females  
80 significantly altered their body temperature when gravid ( $P_{bt-g}$ ) to reduce such mismatches.  
81 Specifically, in species with high non-gravid preferred body temperature ( $P_{bt-ng}$ ), where thermal  
82 conflicts are potentially most severe, females significantly reduced their body temperature when  
83 gravid (negative values of Hedges'  $g$ ; Fig. 1). Conversely, in species with low preferred body  
84 temperatures females increased their body temperature when gravid (positive values of Hedges'  
85  $g$ ; Fig. 1). Combined this strongly suggests that females with extreme body temperatures regulate  
86 their own body temperature to meet the thermal optima of embryos (Table S3 = M1). This  
87 appears to be required as there was little evidence that the optimal temperature for embryo

88 development ( $T_{opt}$ ) coevolves with non-gravid female preferred body temperatures (phylogenetic  
89 correlation (MR-BPMM): PM = 0.53, CI: -0.27, 0.93,  $pMCMC$  = 0.15. Table S4 = M2) and both  
90  $P_{bt}$  and  $T_{opt}$  were estimated to evolve slowly (raw data mean $\pm$ SD: Oviparous species,  $P_{bt}$  =  
91 32.41 $\pm$ 4.15 °C,  $N_{species}$  = 103;  $T_{opt}$  = 27.15 $\pm$ 1.92 °C,  $N_{species}$  = 47. Viviparous species  $P_{bt}$  =  
92 29.5 $\pm$ 4.06 °C,  $N_{species}$  = 61;  $T_{opt}$  = 26.0  $\pm$ 2.23 °C,  $N_{species}$  = 5. MR-BPMM:  $P_{bt}$  phylo  $H^2$ : 0.91, CI:  
93 0.80, 0.95.  $T_{opt}$  phylo  $H^2$ : 0.91, CI: 0.71, 0.99. Table S4 = M2).

94

95 *Gravid females shift their body temperatures towards embryo thermal optima regardless of*  
96 *parity mode*

97 Contrary to the expectation that selection for behavioural plasticity is greater in live-bearing  
98 females, their adjustment of body temperature when gravid did not differ from egg-laying  
99 females (Table S5 = M3). Egg-laying females with higher  $P_{bt}$  down-regulated their temperature  
100 when gravid while species with low  $P_{bt}$  up-regulated their body temperatures in a similar way to  
101 live-bearing females (Fig. 2. Phylogenetic correlation between  $P_{bt}$  and Hedges'  $g$ : Oviparous PM  
102 = -0.90, CI: -0.97, 0.02,  $pMCMC$  = 0.05; Viviparous PM = -0.88, CI: -0.98, -0.30,  $pMCMC$  =  
103 0.01. Table S6 = M4). Ancestral reconstructions of Hedges'  $g$  also showed that, in lineages  
104 where there were thermal mismatches between adults and embryos, females adjusted their body  
105 temperature to a much greater extent than when their thermal optima were aligned, irrespective  
106 of whether they were egg-laying or live-bearing (Fig. 2. MR-BPMM: Oviparous ancestors  
107 Hedges'  $g$  PM = -1.22, CI = -3.09, -0.44,  $pMCMC$  < 0.01. Viviparous ancestors Hedges'  $g$  PM =  
108 -1.27, CI = -1.63, -0.53,  $pMCMC$  = 0.001. Table S7 = M5). Consequently, estimates of Hedges'  
109  $g$  did not differ between the ancestors of oviparous and viviparous species (Fig. 2B). This  
110 suggests that behavioural plasticity was present prior to the emergence of live birth.

111

112 *An alternative explanation for the evolution of viviparity from oviparity?*

113 The presence of female thermal plasticity in egg-laying and live bearing species suggests it may  
114 circumvent the barriers to the evolution of live-bearing imposed by mismatches in slowly  
115 evolving thermal optima of adults and embryos. However, another possibility is that viviparity  
116 evolves predominantly in lineages where adult and embryo thermal optima are already aligned,  
117 alleviating the potential costs to females of adjusting their body temperatures. Estimates of  $P_{bt}$   
118 and  $T_{opt}$  in the egg-laying ancestors of live-bearing species showed that they were no more likely

119 to have aligned adult and embryo thermal optima than the ancestors of egg-laying species.  
120 Specifically, 5% of ancestors of live-bearing species had aligned embryo and adult thermal  
121 optima compared to 14% in the ancestors of egg-laying species (Fig. 3,  $\chi^2 = 3.6$ ,  $df=1$ ,  $P > 0.05$ .  
122 Table S8-S9 = M5). Consequently, in 95% of the oviparous ancestors of viviparous species there  
123 were mismatches between the predicted thermal optima of embryos and adults, illustrating a  
124 widespread need for female plasticity to resolve thermal conflicts (Table S8-S9).

125

## 126 **Discussion**

127

128 Our results suggest that the upper thermal limit of embryos is commonly lower than the preferred  
129 body temperature of females in oviparous snakes and lizards. Both adult and embryo thermal  
130 biology appear to evolve slowly, generating a wide-spread and evolutionarily persistent  
131 mismatch between the thermal optima of mothers and their embryos. Our data suggest non-  
132 gravid females have preferred body temperatures that are on average 4 °C higher than the  
133 temperature that maximises hatching success. Incubation experiments have shown that exposure  
134 to such temperatures throughout development may cause malformations or jeopardise embryo  
135 survival (reviewed in<sup>15</sup>). As there was little evidence that female preferred body temperature and  
136 offspring thermal optima coevolve, such mismatches may be difficult to resolve and thus hamper  
137 transitions to viviparity.

138

139 Our findings support the hypothesis that the thermal mismatch between females and embryos is  
140 resolved by females adjusting their body temperature when gravid to meet the thermal  
141 requirements of their embryos<sup>23</sup>. This behavioural plasticity effectively eliminates barriers to the  
142 evolution of viviparity. The shifts in body temperature between gravid and non-gravid females  
143 (Hedges'  $g$ ) were significantly phylogenetically correlated with the discrepancy between adult  
144 and embryo thermal optima in both oviparous and viviparous species. Moreover, ancestral state  
145 reconstructions suggest that this behavioural plasticity was present prior to the emergence of live  
146 birth, negating the need for adult and embryo thermal optima to be aligned for viviparity to  
147 evolve.

148

149 The down-regulation of body temperature by gravid egg-laying females may appear surprising  
150 considering that most of these species lay their eggs within the early stages of development  
151 (commonly around the time of limb bud formation)<sup>24</sup>. However, early developmental stages,  
152 involving gastrulation, neurulation and organogenesis, are potentially even more sensitive to  
153 thermal stress than later stages, which are predominantly associated with growth<sup>16,20</sup>. The  
154 temperature sensitivity of early-stage embryos may therefore generate selection for the resolution  
155 of mother-offspring thermal conflicts in both egg-laying and live-bearing species. If true, the key  
156 innovation of live birth may owe its evolutionary origin to mechanisms of behavioural  
157 temperature regulation put in place long before live birth emerged.

158

159 Behavioural plasticity has continued to play an important role in thermal adaptation over and  
160 above facilitating the evolution of live birth. Specifically, behavioural plasticity is frequently  
161 maintained in viviparous species that have colonised cool climates. Such behavioural flexibility  
162 enables females to upregulate their body temperature to maintain embryos at significantly  
163 warmer temperatures than the external environment, contributing to the adaptive value of  
164 viviparity<sup>2,7,8,25,26</sup>. In turn, the ability to cope with a greater range of temperature conditions has  
165 the potential to allow populations to persist and expand into suboptimal environments<sup>27</sup>. Female  
166 thermoregulatory behaviour therefore appears to be a key adaptation that helps resolve thermal  
167 mismatches between adults and embryos and facilitate the expansion of reptiles into a variety of  
168 environments.

169 **Main Text References**

- 170 1. Doody, J. S. & Moore, J. A. Conceptual model for thermal limits on the distribution of  
171 reptiles. *Herpetological Conservation and Biology* **5**, 283–289 (2010).
- 172 2. Shine, R. The evolution of viviparity in reptiles: An ecological analysis. in *Biology of the*  
173 *Reptilia* vol. 15 605–694 (John Wiley & Sons, Ltd, 1985).
- 174 3. Lambert, S. M. & Wiens, J. J. Evolution of viviparity: a phylogenetic test of the cold-climate  
175 hypothesis in Phrynosomatid lizards. *Evolution* **67**, 2614–2630 (2013).
- 176 4. Shine, R. A new hypothesis for the evolution of viviparity in reptiles. *The American*  
177 *Naturalist* **145**, 809–823 (1995).
- 178 5. Tinkle, D. W. & Gibbons, J. W. The distribution and evolution of viviparity in reptiles.  
179 (1977).
- 180 6. Beuchat, C. A. Temperature effects during gestation in a viviparous lizard. *Journal of*  
181 *Thermal Biology* **13**, 135–142 (1988).
- 182 7. Le Henanff, M., Meylan, S. & Lourdais, O. The sooner the better: reproductive phenology  
183 drives ontogenetic trajectories in a temperate squamate (*Podarcis muralis*). *Biol J Linn Soc*  
184 **108**, 384–395 (2013).
- 185 8. Warner, D. A. & Shine, R. Fitness of juvenile lizards depends on seasonal timing of  
186 hatching, not offspring body size. *Oecologia* **154**, 65–73 (2007).
- 187 9. Ma, L., Buckley, L. B., Huey, R. B. & Du, W.-G. A global test of the cold-climate  
188 hypothesis for the evolution of viviparity of squamate reptiles. *Global Ecology and*  
189 *Biogeography* **27**, 679–689 (2018).
- 190 10. Qu, Y., Li, H., Gao, J., Xu, X. & Ji, X. Thermal preference, thermal tolerance and the  
191 thermal dependence of digestive performance in two Phrynocephalus lizards (Agamidae),  
192 with a review of species studied. *Current Zoology* **57**, 684–700 (2011).
- 193 11. Mathies, T. & Andrews, R. M. Influence of pregnancy on the thermal biology of the lizard,  
194 *Sceloporus jarrovi*: why do pregnant females exhibit low body temperatures? *Functional*  
195 *Ecology* **11**, 498–507 (1997).
- 196 12. Galliard, J.-F. L., Bris, M. L. & Clobert, J. Timing of locomotor impairment and shift in  
197 thermal preferences during gravidity in a viviparous lizard. *Functional Ecology* **17**, 877–885  
198 (2003).



- 199 13. Monasterio, C., Shoo, L. P., Salvador, A., Iraeta, P. & Díaz, J. A. High temperature  
200 constrains reproductive success in a temperate lizard: implications for distribution range  
201 limits and the impacts of climate change. *Journal of Zoology* **291**, 136–145 (2013).
- 202 14. Du, W.-G., Shine, R., Ma, L. & Sun, B.-J. Adaptive responses of the embryos of birds and  
203 reptiles to spatial and temporal variations in nest temperatures. *Proceedings of the Royal*  
204 *Society B: Biological Sciences* **286**, 20192078 (2019).
- 205 15. Noble, D. W. A., Stenhouse, V. & Schwanz, L. E. Developmental temperatures and  
206 phenotypic plasticity in reptiles: a systematic review and meta-analysis. *Biological Reviews*  
207 **93**, 72–97 (2018).
- 208 16. Sanger, T. J., Kyrkos, J., Lachance, D. J., Czesny, B. & Stroud, J. T. The effects of thermal  
209 stress on the early development of the lizard *Anolis sagrei*. *Journal of Experimental Zoology*  
210 *Part A: Ecological and Integrative Physiology* **329**, 244–251 (2018).
- 211 17. Andrews, R. M., Mathies, T. & Warner, D. A. Effect of Incubation Temperature on  
212 Morphology, Growth, and Survival of Juvenile *Sceloporus undulatus*. *Herpetological*  
213 *Monographs* **14**, 420–431 (2000).
- 214 18. Braña, F. & Ji, X. Influence of incubation temperature on morphology, locomotor  
215 performance, and early growth of hatchling wall lizards (*Podarcis muralis*). *J Exp Zool* **286**,  
216 422–433 (2000).
- 217 19. Van Damme, R., Bauwens, D., Braña, F. & Verheyen, R. F. Incubation Temperature  
218 Differentially Affects Hatching Time, Egg Survival, and Hatchling Performance in the  
219 Lizard *Podarcis muralis*. *Herpetologica* **48**, 220–228 (1992).
- 220 20. Beuchat, C. A. Temperature effects during gestation in a viviparous lizard. *Journal of*  
221 *Thermal Biology* **13**, 135–142 (1988).
- 222 21. Blackburn, D. G. Squamate Reptiles as Model Organisms for the Evolution of Viviparity.  
223 *Herpetological Monographs* **20**, 131–146 (2006).
- 224 22. Blackburn, D. G. Evolution of viviparity in squamate reptiles: Reversibility reconsidered. *J*  
225 *Exp Zool B Mol Dev Evol* **324**, 473–486 (2015).
- 226 23. Beuchat, C. A. Reproductive Influences on the Thermoregulatory Behavior of a Live-  
227 Bearing Lizard. *Copeia* **1986**, 971–979 (1986).
- 228 24. Andrews, R. M. & Mathies, T. Natural History of Reptilian Development: Constraints on the  
229 Evolution of Viviparity. *BioScience* **50**, 227–238 (2000).

- 230 25. Andrews, R. M. Evolution of viviparity in squamate reptiles (*Sceloporus* spp.): a variant of  
231 the cold-climate model. *Journal of Zoology* **250**, 243–253 (2000).
- 232 26. Uller, T. & Olsson, M. Offspring size and timing of hatching determine survival and  
233 reproductive output in a lizard. *Oecologia* **162**, 663–671 (2010).
- 234 27. Muñoz, M. M. The Bogert effect, a factor in evolution. *Evolution* **76**, 49–66 (2022).

235 **Acknowledgments**

236 This work was funded by a Wenner-Gren Foundation Postdoctoral Fellowship (UPD2019-0208)  
237 to AKP and TU, a Wallenberg Academy fellowship (2018.0138) to CKC and starting grants  
238 from the European Research Council (#948126) and the Swedish Research Council (#2020-  
239 03650) to NF.

240

241 **Competing interests:** Authors declare that they have no competing interests.

242

243 **Data and materials availability:** All data and code are publicly available at:

244 <https://doi.org/10.17605/OSF.IO/JT28V>

245 **Figures and Tables**

246

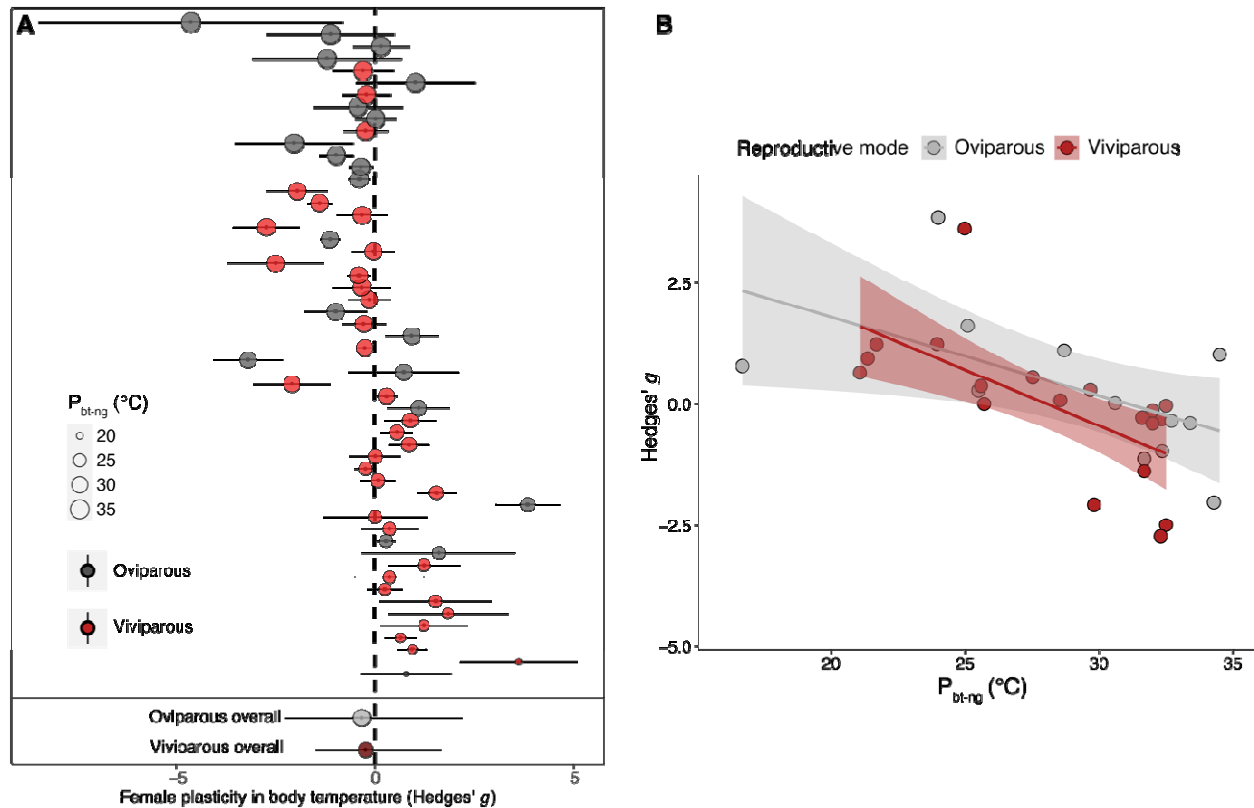

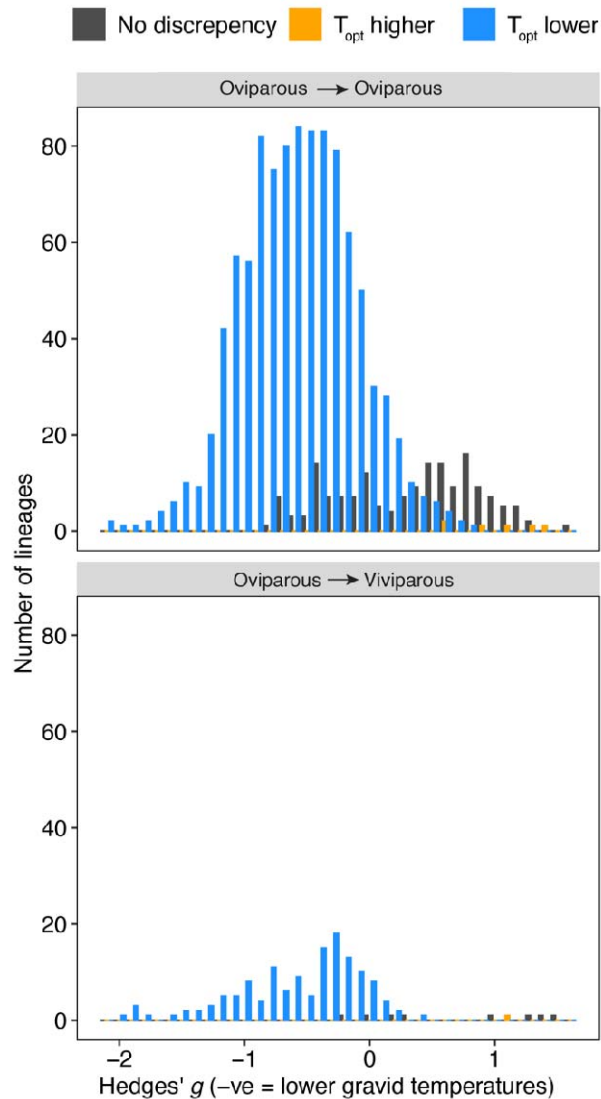

260

261 **Fig. 2. Female behavioural plasticity facilitates transitions to live birth.** The adjustment of  
262 body temperature by females in lineages where egg laying was maintained (top panel) and where  
263 live bearing evolved (bottom panel) in relation to whether embryos had a significantly lower  
264 ( $T_{opt}$  lower; blue), higher ( $T_{opt}$  higher; orange), or aligned (No discrepancy; grey) estimated  
265 thermal optimum than adult preferred body temperature (see Methods section “Testing if  
266 Hedges’  $g$  is related to discrepancies between  $P_{bt}$  and  $T_{opt}$  in the ancestors of oviparous and  
267 viviparous species” for how mismatches in thermal optima were estimated).

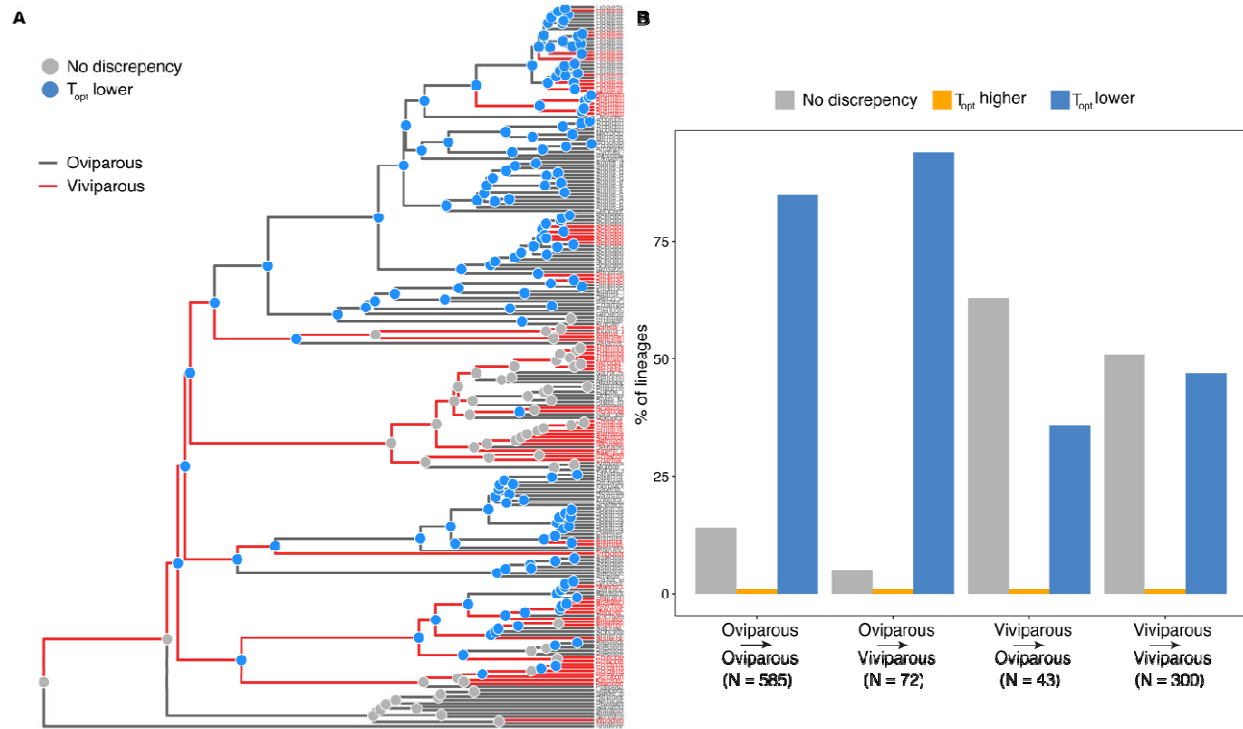

268

269 **Fig. 3. Alignment of embryo and adult thermal optima and transitions to viviparity across**

270 **224 species of squamate reptiles. (A)** Tip labels and branches are coloured according to

271 reproductive modes (red = live bearing/viviparous, grey = egg laying/oviparous; branch colours

272 represent predicted ancestral values; Table S9). Coloured nodes correspond to the discrepancy

273 between  $P_{bt}$  and  $T_{opt}$  (grey = no discrepancy, blue =  $T_{opt} < P_{bt}$ ).

274 transitions between reproductive modes and discrepancy between  $P_{bt}$  and  $T_{opt}$  (grey = no

275 discrepancy, blue =  $T_{opt} < P_{bt}$ , orange =  $T_{opt} > P_{bt}$ ).

## 276 **Methods**

277

### 278 *Literature search and data collection*

279 To investigate the relationship between maternal behavioural plasticity and embryo thermal  
280 sensitivity, we used reproductive mode data from Pyron and Burbrink<sup>28</sup>, and collated existing  
281 data to collate three datasets: 1) female body temperature when gravid ( $P_{bt-g}$ ) and not gravid ( $P_{bt-}$   
282  $ng$ ) (“Hedges’  $g$  dataset”); 2) female preferred body temperature ( $P_{bt}$ ) (“ $P_{bt}$  dataset”); and 3) the  
283 temperature at which hatching success was maximised ( $T_{opt}$ ) (“ $T_{opt}$  dataset”). Complete data are  
284 presented in Table S1. Data were collated for each of the variables from literature searches using  
285 ISI *Web of Science* (v.5.30) with search terms specific to each dataset. Search results were then  
286 imported and sorted for relevance using Rayyan software<sup>29</sup> (for details see Supplementary  
287 Information).

288

### 289 *Estimating Hedges’ $g$*

290 Published articles presenting data on thermal preference (preferred body temperature) in gravid  
291 ( $P_{bt-g}$ ) versus non-gravid ( $P_{bt-ng}$ ) adult female squamate species were collected for the “Hedges’  
292  $g$ ” dataset, following the preferred reporting items for systematic reviews and meta-analyses  
293 (PRISMA) statement<sup>30</sup>. We conducted a literature search using ISI *Web of Science* (v.5.30) with  
294 the ‘title’, ‘abstract’ or ‘keywords’ search terms ‘body temperature\* AND gravid\* OR  
295 reproduct\*’, along with one of the following: ‘squamate\*’, ‘lizard\*’, ‘snake\*’ which yielded a  
296 total of 721 papers. We searched available literature for both field and laboratory measures of  
297 female body temperature, comprising studies that directly compared  $P_{bt-gravid}$  and  $P_{bt}$ . 648 papers  
298 were rejected due to irrelevance (PRISMA statement; Fig. S1). We only included studies that  
299 provided both sample size and error around mean preferred body temperature. Studies used  
300 artificial temperature gradients in the laboratory ( $n = 37$ ) or measured preferred basking  
301 temperature in the field ( $n = 36$ ). Laboratory studies generally measured body temperature in the  
302 same female during gestation ( $P_{bt-g}$ ) and either before or after gestation ( $P_{bt-ng}$ ) as repeated  
303 measures. In contrast, field studies often measured body temperature on a population during the  
304 reproductive season, comparing body temperatures in gravid and non-gravid females at a single  
305 time point. Combined, this yielded a total of 73 studies published up to July 2022 from which  
306 effect sizes were calculated for 52 species (live bearing:  $n = 32$  and egg laying:  $n = 20$ ). Effect

307 sizes of female adjustment of body temperature when gravid for each species were calculated as  
308 the standardised mean differences (Hedges'  $g$ ) in preferred body temperatures between non-  
309 gravid and gravid females ( $P_{bt-g} - P_{bt-ng}$ ), adjusting for small sample sizes<sup>31</sup>. We examined the  
310 mean Hedges'  $g$  between laboratory or field studies and found there were no significant  
311 differences (PM (Oviparous) = -0.67, CI = -1.63, 0.60; PM (Viviparous) = 0.65, CI = -0.20, 1.30.  
312 Table S10. See Verification analyses in Supplementary Information).

313

#### 314 *Estimating $P_{bt}$ independently from Hedges' $g$*

315 We collected independent data on the preferred body temperature in adult females ( $P_{bt}$ ) using the  
316 same method described for the "Hedges'  $g$ " dataset, using search terms 'body temperature\*',  
317 along with one of the following: 'squamata\*', 'lizard\*', 'snake\*' which yielded a total of 1075  
318 papers. We only used data from studies where  $P_{bt}$  for females was stated explicitly (unless  
319 pooled male/female data stated no significant effect of sex) and excluded data on females that  
320 were described to be gravid or data collected during the reproductive season. We additionally  
321 cross-referenced this search with articles cited in<sup>32</sup>, supplementing our original dataset with 42  
322 studies (PRISMA statement; Fig. S2). This provided a final dataset of female preferred body  
323 temperature for 163 species that was independent of the gravid and non-gravid measures used to  
324 calculate Hedges'  $g$  (live bearing:  $n = 61$  and egg laying:  $n = 103$ , note  $P_{bt}$  data for *Zootoca*  
325 *vivipara* was available for both reproductive modes and both were included in the analyses – see  
326 below).

327

#### 328 *Estimating $T_{opt}$*

329 Hatching success and egg incubation temperature data for 47 egg-laying and 4 live-bearing  
330 species was extracted from the Reptile Development Database (RepDevo vers 1.0.2; <sup>33</sup>), and  
331 from the literature using search terms: 'temperature\* AND incubat\* AND hatch\* OR surv\*',  
332 along with one of the following: 'squamata\*', 'lizard\*', 'snake\*', yielding a total of 671 papers  
333 (PRISMA statement; Fig. S3). We only included studies where three or more constant  
334 temperature treatments were used under controlled laboratory conditions, resulting in 661 papers  
335 being rejected due to irrelevance or overlap with the Reptile Development Database. The final  
336  $T_{opt}$  dataset, consisting of 51 species, obtained from 81 studies. Thermal performance curves,  
337 relating hatching success with incubation temperature, were fit using nonlinear least-squares



338 regression with the *nls.LM* function in the *minpack.LM* package in  $R^{34}$ . For each species-specific  
339 function we then calculated a single-point estimate at which optimal hatching success occurred  
340 (here-on designated “ $T_{opt}$ ”). Raw thermal performance data are provided in Fig. S4.

341  
342 Given that  $T_{opt}$  had a strong phylogenetic signature (Phylogenetic Heritability ( $H^2$ ) = 0.95, 95%  
343 CI: 0.74 – 0.99; Table S4) we fitted a Bayesian Phylogenetic Mixed Effects Model (BPMM) to  
344 hatching success data for all species jointly. Including phylogenetic information allowed for the  
345  $T_{opt}$  of each species to be estimated with greater accuracy and precision given that the range and  
346 number of temperatures across species varied (range: 10-40 °C, mean number of temperatures  
347 per species  $\pm$  SD:  $7.62 \pm 4.29$ ). Compared to non-phylogenetic models,  $T_{opt}$  estimates produced  
348 from phylogenetic models (BPMM) showed smaller sampling error and avoided convergence  
349 problems in estimating model parameters.

350  
351 Importantly, this approach was not used to estimate  $T_{opt}$  data for species without data, only to  
352 better predict  $T_{opt}$  values for species for which there were data. The  $T_{opt}$  BPMM model was run  
353 for 1,100,000 iterations with a burn-in of 100,000 iterations and thinning rate of 500, leaving us  
354 with 2,000 samples from the posterior distribution. Autocorrelation was low (lag values  $< 0.1$ )  
355 and trace plots showed chains mixed well for all parameters. Our model included temperature as  
356 a fixed effect (estimating both a linear and quadratic slopes) and random slopes of temperature  
357 (linear and quadratic slopes) fitted at the phylogenetic level. From our BPMM we estimated  $T_{opt}$ ,  
358 and its corresponding sampling variance, using the posterior distribution of fixed effects and best  
359 linear unbiased predictors (BLUPs) for the random slopes (linear and quadratic) for each species  
360 as follows:

$$T_{opt} = - \frac{(T_f + T_{sp})}{(2(T_f^2 + T_{sp}^2))}$$

361 Where  $T_f$  and  $T_f^2$  are the posterior linear and quadratic fixed effect estimates for temperature and  
362  $T_{sp}$  and  $T_{sp}^2$  are the posterior BLUPs for a given species extracted from the phylogenetic random  
363 slopes. Calculating  $T_{opt}$  using the posterior distribution of fixed and random effects meant that  
364 sampling error for a given species could be propagated to subsequent analyses (see below).

365

366 **General Statistical Methods**

367 We used Bayesian Phylogenetic Mixed Effects Models with single (BPMM) and multiple  
368 response variables (MR-BPMM) to estimate phylogenetic correlations between traits and  
369 reconstruct ancestral states of continuous variables. In all MR-BPMM global intercepts were  
370 removed to estimate an intercept for each trait. Hidden Markov Models (HMMs) were used to  
371 reconstruct ancestral states of viviparity and Phylogenetic Ridge Regression (PRR) were used to  
372 check for rate shifts in continuous traits across the phylogenetic tree. All analyses were  
373 conducted in R version 4.0.1<sup>35</sup>.

374

#### 375 *Bayesian Phylogenetic Mixed Effects Models (BPMM)*

376 We implemented BPMMs in R with the *MCMCglmm* package<sup>36</sup>. Hedges'  $g$ ,  $P_{bt}$  and  $T_{opt}$  were  
377 modelled with Gaussian error distributions. For some species there were multiple estimates of  
378 Hedges'  $g$ , which was accounted for in two ways. In multi-response models where relationships  
379 between multiple traits were examined, a single data point of a weighted mean of Hedges'  $g$  was  
380 included for each species. In models where Hedges'  $g$  was a single response variable (M3 and  
381 M6), species was included as a random effect to account for multiple data points per species.

382

383 The random effect *animal* with a variance-(co)variance matrix derived from the phylogenetic  
384 tree was included in all models<sup>36</sup>. We calculated the phylogenetic signature (equivalent to  
385 heritability,  $H^2$ , in the terminology of *MCMCglmm*) for each trait as the variance explained by  
386 *animal* relative to total random effect variance. Multi-response BPMMs (MR-BPMMs) fitted  
387 with *MCMCglmm* allow the phylogenetic and within-species (residual) correlations between  
388 traits to be estimated by fitting unstructured covariance matrices. Correlations between traits  
389 (e.g., A & B) were calculated as:

$$\frac{cov(A, B)}{\sqrt{(var(A) \cdot var(B))}}$$

390

#### 391 *Model convergence, prior settings and characterisation of posterior distributions*

392 Non-informative uniform priors were used for fixed effects and inverse-Wishart priors for  
393 random effects ( $V = 1$ ,  $\nu = 0.002$ ;<sup>36</sup>). To examine model convergence we ran three independent  
394 MCMC chains and examined autocorrelation, which was low (lag values < 0.1), trace plots,  
395 which showed chains mixed well, and Gelman and Rubin's convergence diagnostic that models

396 converged (potential scale reduction factors were all below 1.1: R function `gelman.diag`<sup>37</sup>). All  
397 models were the run for 3000000 iterations, with a burn-in of 999500 iterations and every 2000<sup>th</sup>  
398 iteration was saved for parameter estimation (see accounting for phylogenetic uncertainty and  
399 data imputation section for more details). Posterior distributions of all parameters were  
400 characterised using modes and 95% credible intervals (CIs). Effects were regarded as significant  
401 where CIs did not span 0. *pMCMC* (number of iterations above or below 0 / total number of  
402 iterations) are also presented to facilitate general interpretation.

403

#### 404 *Missing data across species*

405 BPMMs permit missing data in response variables which was crucial given the patchy  
406 distribution of the data (Table S1). The accuracy with which missing data is predicted is related  
407 to the phylogenetic signature in traits and the strength of phylogenetic correlations between  
408 traits<sup>38</sup>. All traits had high phylogenetic signature (phylogenetic  $H^2 > 70\%$ ) producing high  
409 correspondence between raw and predicted values (Fig. S6; See also Supplementary  
410 Information). As a result, our BPMMs enabled us to deal with the fact that not all traits have  
411 been measured in all species.

412

#### 413 *Accounting for differences in sampling variances across data points*

414 The accuracy of measures of Hedges'  $g$ ,  $P_{bt}$  and  $T_{opt}$  varied across species due to study design  
415 and sample sizes which can be accounted for by weighting data points by their inverse sampling  
416 variance using the 'mev' term in *MCMCglmm*. However, missing values in sampling variances  
417 are not permitted in *MCMCglmm*. As data on the error and sample size was missing for Hedges'  
418  $g$ ,  $P_{bt}$  and  $T_{opt}$  it would not have been possible to account for sampling error in our analyses  
419 without drastically reducing the size of our dataset. Consequently, we used multiple imputation  
420 with predictive mean matching in the *mice* package in R to impute missing error and sample  
421 sizes<sup>39</sup>. Samples sizes were not available for reproductive mode, but it is typically invariant  
422 within populations leading to minimal measurement error. Therefore, the mev term for  
423 reproductive mode was specified as 0.

424

425 To incorporate uncertainty in imputations, 20 complete datasets were generated, and all analyses  
426 were conducted by sampling across these datasets. Each model sampled through the 20 datasets

427 75 times (1500 sampling events) for 2000 iterations with only the last iteration being saved.  
428 Estimates from the last iteration of each sampling event  $i$  were used as the starting parameter  
429 values for the next  $i + 1$ . This led to a posterior sample of 1500 iterations, the first 500 iterations  
430 were discarded as a burn-in and the remaining 1000 (50 per dataset) were used to estimate  
431 parameters (total iterations = 3000000 (2000 x 1500), burn-in = 999500 (1999 x 500)). Pooling  
432 of posterior distributions from model parameters from across each of the  $n = 20$  datasets enabled  
433 imputation uncertainty in sampling variances to be accounted for in the posterior distribution.

434

#### 435 *Phylogeny and accounting for phylogenetic uncertainty*

436 We used a recent phylogeny of squamates pruned to the 224 species with thermal data<sup>40</sup>. For  
437 BPMMs each model sampled through 1500 trees using the same procedure as described for  
438 sampling across imputed datasets. Each of the 1500 posterior samples was obtained using a  
439 different tree. Pooling of posterior distributions from model parameters from across trees enabled  
440 phylogenetic uncertainty to be accounted for. To account for phylogenetic uncertainty in the  
441 reconstructions of viviparity, HMMs were run on the same 1000 trees that posterior estimates  
442 were obtained from using BPMMs (see ‘*Testing if Hedges’ g is related to discrepancies between*  
443  *$P_{bt}$  and  $T_{opt}$  in the ancestors of oviparous and viviparous species’* for more details). For figures  
444 and to compare the performance of different analytical techniques in reconstructing reproductive  
445 mode,  $T_{opt}$  and  $P_{bt}$  we used the maximum clade credibility tree provided by<sup>40</sup>.

446

#### 447 **Specific Statistical Analyses**

##### 448 *Testing if Hedges’ g is related to $P_{bt}$*

449 The phylogenetic correlation between  $P_{bt}$  and Hedges’  $g$  was estimated using a MR-BPMM with  
450 unstructured phylogenetic and residual covariance matrices fitted as random effects (Table S3. R  
451 code model M1.1).

452

##### 453 *Estimating the phylogenetic correlation between $P_{bt}$ and $T_{opt}$*

454 The phylogenetic signature in  $P_{bt}$  and  $T_{opt}$  and their phylogenetic correlation was estimated using  
455 a MR-BPMM with unstructured phylogenetic and residual covariance matrices fitted as random  
456 effects (Table S4. R code model M2.1).

457

458 *Testing if Hedges'  $g$  is different between oviparous and viviparous species*

459 Differences in Hedges'  $g$  between oviparous and viviparous species were tested using a BPMM  
460 with reproductive mode as a fixed effect (Table S5. R code model M3.1).

461  
462 *Testing if the relationship between Hedges'  $g$  and  $P_{bt}$  differs between oviparous and viviparous*  
463 *species*

464 We tested if the relationship between Hedges'  $g$  and  $P_{bt}$  differed between oviparous and  
465 viviparous species using a MR-BPMM with separate unstructured phylogenetic and residual  
466 covariance matrices for each reproductive mode specified using the 'at.level' function in  
467 *MCMCglmm* (Table S6. R code model M4.1).

468  
469 *Testing if Hedges'  $g$  is related to discrepancies between  $P_{bt}$  and  $Topt$  in the ancestors of*  
470 *oviparous and viviparous species*

471 To examine values of Hedges'  $g$  in relation to the discrepancy between  $P_{bt}$  and  $Topt$  in the  
472 ancestors of oviparous and viviparous species a two-step approach was used. First, the ancestral  
473 states of reproductive mode were estimated for each node in each of the 1000 trees using HMMs  
474 (R code model M5\_corHMM). The phylogenetic distribution of the evolutionary origins of  
475 viviparity in squamates remains highly debated<sup>22,41</sup>. Our aim here was not to try to resolve this  
476 controversy, but past literature has highlighted that the rate of evolution of viviparity varies  
477 across squamates and this has important effects on ancestral reconstructions<sup>42-44</sup>. Not accounting  
478 for such rate variation has resulted in the ancestor of squamates being predicted to be viviparous  
479 and many reversals of viviparity to oviparity, both of which are thought to be unlikely<sup>43,45,46</sup>.

480  
481 We therefore used HMMs, implemented in the R package 'corHMM' that can estimate variation  
482 in the rate of evolution of binary characters across phylogenies<sup>47</sup>. To do this, a number of  
483 different rate categories from one state (e.g., oviparity) to another state (e.g., viviparity) are pre-  
484 defined and then estimated across the phylogeny. The most likely number of rate categories can  
485 be identified by comparing AIC values across models with different numbers of pre-defined rate  
486 categories.

487

488 We found that on the trimmed phylogeny (224 species) AIC values were lowest when there were  
489 2 rate categories (See R script ‘4. PBT models.R section 5’). This indicated that in two clades,  
490 transitions to viviparity occurred at a higher rate than in other parts of the phylogeny (Fig. S5).  
491 This model produced ancestral estimates that are consistent with the predominant view of  
492 viviparity evolution across squamates<sup>43,48</sup>: a root state of oviparity and relatively few reversals of  
493 viviparity to oviparity compared to the transitions from oviparity to viviparity (Table S9).  
494 Estimates of ancestral states from HMMs were used to identify transitions between oviparity and  
495 viviparity by classifying nodes in the following way: 1) oviparous with only oviparous  
496 descendants (oviparous to oviparous); 2) viviparous with only viviparous descendants  
497 (viviparous to viviparous); 3) oviparous with at least one viviparous descendant (oviparous to  
498 viviparous); and 4) viviparous with at least one oviparous descendant (viviparous to oviparous).  
499

500 In the second step, a MR-BPPM with Hedges’  $g$ ,  $P_{bt}$ , and  $T_{opt}$  as response variables was used to  
501 reconstruct ancestral states for each trait (R code model M5.1). From this model mismatches in  
502 the thermal optima of females and embryos (CI of  $P_{bt} - T_{opt}$  not overlapping 0) and values of  
503 Hedges’  $g$  were estimated for each node (Table S8 & S9). To test if female plasticity differed  
504 between the ancestors of oviparous and viviparous lineages, with and without mismatched  
505 mother-offspring thermal optima, we examined if estimates of Hedges’  $g$  were different (CIs not  
506 overlapping 0) between matched and unmatched thermal optima for transitions from ‘oviparous  
507 to viviparous’ compared to transitions from ‘oviparous to oviparous’.  
508

509 To verify that our ancestral estimates of Hedges’  $g$ ,  $P_{bt}$ , and  $T_{opt}$  from the MR-BPMM were  
510 robust to variation in rates of evolution across the phylogeny we used phylogenetic ridge  
511 regression (PRR) implemented in the R package ‘RRphylo’<sup>49</sup>. We found that PRR models that  
512 allowed for rate variation produced similar estimates to BPMMs for each trait (Pearson’s  
513 correlation coefficient ( $r$ ): Hedges’  $g = 0.82$ ,  $P_{bt} = 0.94$ ,  $T_{opt} = 0.98$ . R script ‘4. PBT models.R  
514 section 5’). Given rate shifts had minimal impact on estimates of ancestral states, we used  
515 estimates from the MR-BPMMs because they: 1) allowed missing data; 2) incorporated sampling  
516 variances associated with response variables; 3) enabled phylogenetic correlations to be  
517 estimated; and 4) produced distributions of estimates (posterior samples) for each node that  
518 allowed significant thermal mismatches between embryos and adults to be calculated.

519

520 To account for phylogenetic uncertainty in estimates of viviparity from HMMs and Hedges'  $g$ ,  
521  $P_{bt}$  and  $T_{opt}$  from MR-BPMMs we estimated the ancestral states for each trait for each node in  
522 each of the 1000 trees (Table S9). Quantifying discrepancies between embryo and adult thermal  
523 optima in relation to transitions in reproductive mode requires summarising posterior  
524 distributions of estimates of  $P_{bt}$  and  $T_{opt}$  for each node, and relating it to its transition category  
525 (oviparous to oviparous viviparous to viviparous, oviparous to viviparous, viviparous to  
526 viviparous). One complication is that for each node the predicted transition category can vary  
527 across trees due to differences in topology and internal tree structure. Discrepancies between  $T_{opt}$   
528 and  $P_{bt}$  can be estimated for each transition category for each node, but this becomes problematic  
529 when some transition categories for some nodes are rare as it results in few posterior samples to  
530 estimate discrepancies. To circumvent this problem, each node was classified according to the  
531 most frequently predicted transition category and related to posterior distributions of Hedges'  $g$ ,  
532  $P_{bt}$  and  $T_{opt}$  summarised across all trees.

533

#### 534 *Discrepancies between embryo and adult thermal optima and the evolution of viviparity*

535 To examine if viviparity evolves more frequently in lineages where the thermal optima of adults  
536 and embryos are aligned, we tested if oviparous nodes with similar thermal optima (CI of  $P_{bt} -$   
537  $T_{opt}$  overlapping 0) produced more descendent viviparous lineages than nodes where there were  
538 mismatches in thermal optima (CI of  $P_{bt} - T_{opt}$  not overlapping 0). Differences in frequencies  
539 were tested using a  $\chi^2$  test of the number of nodes with and without thermal mismatches for  
540 oviparous nodes with oviparous descendants versus oviparous nodes with viviparous descendants  
541 (R script '5. PBT Proc.R section 5B')

542

#### 543 *Verification analyses*

##### 544 *Checking for differences in Hedges' $g$ between laboratory and field studies*

545 Whether laboratory and field studies differed in their estimates of Hedges'  $g$  was checked using a  
546 BPMM of Hedges'  $g$  with study type as a fixed effect (R code model M5.4. Table S10).

547

##### 548 *Checking ancestral state reconstructions of viviparity were robust to missing data*

549 We examined how well models predicted ancestral values of reproductive mode with missing tip  
550 data using HMMs in two ways. First, we compared the ancestral states of nodes predicted using  
551 all available data on reproductive mode from Pyron and Burbrink<sup>28</sup> ( $n_{\text{species}} = 7831$ , Table S2) to  
552 the predicted states obtained using only the trimmed tree and data ( $n_{\text{species}} = 224$ ). Second, we  
553 examined the accuracy with which ancestral nodes could be predicted on the phylogeny of 7831  
554 species using only reproductive mode data from the 224 species with thermal data. The predicted  
555 ancestral states from both these analyses can be found in Table S11.



556 **Method References**

- 557 28. Pyron, R. A. & Burbrink, F. T. Early origin of viviparity and multiple reversions to oviparity  
558 in squamate reptiles. *Ecology Letters* **17**, 13–21 (2014).
- 559 29. Ouzzani, M., Hammady, H., Fedorowicz, Z. & Elmagarmid, A. Rayyan—a web and mobile  
560 app for systematic reviews. *Syst Rev* **5**, 210 (2016).
- 561 30. Moher, D., Liberati, A., Tetzlaff, J., Altman, D. G., & PRISMA Group. Preferred reporting  
562 items for systematic reviews and meta-analyses: the PRISMA statement. *PLoS Med.* **6**,  
563 e1000097 (2009).
- 564 31. Borenstein, M., Hedges, L. V., Higgins, J. P. & Rothstein, H. R. Effect Sizes Based on  
565 Means. in *Introduction to Meta-Analysis* 21–32 (John Wiley & Sons, Ltd, 2009).  
566 doi:10.1002/9780470743386.ch4.
- 567 32. Sinervo, B. *et al.* Erosion of Lizard Diversity by Climate Change and Altered Thermal  
568 Niches. *Science* **328**, 894–899 (2010).
- 569 33. Noble, D. W. A. *et al.* A comprehensive database of thermal developmental plasticity in  
570 reptiles. *Sci Data* **5**, 1–7 (2018).
- 571 34. Elzhov, T. V., Mullen, K. M., Spiess, A.-N. & Bolker, B. *minpack.lm: R Interface to the*  
572 *Levenberg-Marquardt Nonlinear Least-Squares Algorithm Found in MINPACK, Plus*  
573 *Support for Bounds.* (2016).
- 574 35. R Core Team. *R: A language and environment for statistical computing.* *R Foundation for*  
575 *Statistical Computing, Vienna, Austria.* (2020).
- 576 36. Hadfield, J. D. MCMC Methods for Multi-Response Generalized Linear Mixed Models: The  
577 MCMCglmm R Package. *Journal of Statistical Software* **33**, 1–22 (2010).
- 578 37. Brooks, S. P. & Gelman, A. General methods for monitoring convergence of iterative  
579 simulations. *Journal of computational and graphical statistics* **7**, 434–455 (1998).
- 580 38. Molina-Venegas, R. *et al.* Assessing among-lineage variability in phylogenetic imputation of  
581 functional trait datasets. *Ecography* **41**, 1740–1749 (2018).
- 582 39. Buuren, S. van & Groothuis-Oudshoorn, K. mice: Multivariate Imputation by Chained  
583 Equations in R. *Journal of Statistical Software* **45**, 1–67 (2011).
- 584 40. Tonini, J. F. R., Beard, K. H., Ferreira, R. B., Jetz, W. & Pyron, R. A. Fully-sampled  
585 phylogenies of squamates reveal evolutionary patterns in threat status. *Biological*  
586 *Conservation* **204**, 23–31 (2016).

- 587 41. Pyron, R. A. Advancing perspectives on parity-mode evolution. *Journal of Experimental*  
588 *Zoology Part B: Molecular and Developmental Evolution* **324**, 562–563 (2015).
- 589 42. Beaulieu, J. M. & O’Meara, B. C. Hidden Markov Models for Studying the Evolution of  
590 Binary Morphological Characters. in *Modern Phylogenetic Comparative Methods and Their*  
591 *Application in Evolutionary Biology: Concepts and Practice* (ed. Garamszegi, L. Z.) 395–  
592 408 (Springer, 2014). doi:10.1007/978-3-662-43550-2\_16.
- 593 43. King, B. & Lee, M. S. Y. Ancestral state reconstruction, rate heterogeneity, and the evolution  
594 of reptile viviparity. *Syst Biol* **64**, 532–544 (2015).
- 595 44. Wright, A. M., Lyons, K. M., Brandley, M. C. & Hillis, D. M. Which came first: The lizard  
596 or the egg? Robustness in phylogenetic reconstruction of ancestral states. *Journal of*  
597 *Experimental Zoology Part B: Molecular and Developmental Evolution* **324**, 504–516  
598 (2015).
- 599 45. Lee, M. S. Y. & Shine, R. Reptilian Viviparity and Dollo’s Law. 11 (2021).
- 600 46. Pyron, R. A. & Burbrink, F. T. Contrasting models of parity-mode evolution in squamate  
601 reptiles. *Journal of Experimental Zoology Part B: Molecular and Developmental Evolution*  
602 **324**, 467–472 (2015).
- 603 47. Beaulieu, J., O’Meara, B., Oliver, J. & Boyko, J. corHMM: Hidden Markov Models of  
604 Character Evolution. (2021).
- 605 48. Blackburn, D. G. Evolution of viviparity in squamate reptiles: Reversibility reconsidered. *J*  
606 *Exp Zool B Mol Dev Evol* **324**, 473–486 (2015).
- 607 49. Castiglione, S. *et al.* A new method for testing evolutionary rate variation and shifts in  
608 phenotypic evolution. *Methods in Ecology and Evolution* **9**, 974–983 (2018).
